# Supplementary material
Source: ML conference proceedings conference paper supplement (https://openreview.net/forum?id=px1OlCcqkj)

| Symbol                          | Usage                                                                                                             |
|---------------------------------|-------------------------------------------------------------------------------------------------------------------|
| $X \in \{0, 1\}$                | Bernoulli random variable indicating whether a product was effective on a random instance                         |
| $q$                             | PDF of the effectiveness distribution                                                                             |
| $Q$                             | CDF of the effectiveness distribution $Q$ .                                                                       |
| $\mu_0$                         | product effectiveness                                                                                             |
| $\mu_b$                         | baseline effectiveness                                                                                            |
| $\sigma_0$                      | variance of a product's effectiveness: $\sigma_0 = \sqrt{(1 - \mu_0)\mu_0}$                                       |
| $\sigma_b$                      | variance of a baseline product's effectiveness: $\sigma_b = \sqrt{(1 - \mu_b)\mu_b}$                              |
| $c_0$                           | fixed cost of running a clinical trial                                                                            |
| $c$                             | per-sample cost                                                                                                   |
| $R$                             | revenue upon approval                                                                                             |
| $\alpha$                        | p-value threshold used by the principal                                                                           |
| $p(\mu_0, n; \mu_b)$            | the probability of observing outcomes at least as good as the evidence conditioned on the null hypothesis $\mu_b$ |
| $z_{\alpha, n}$                 | The critical region given $n$ samples and p-value $\alpha$                                                        |
| $\text{Pass}(\alpha, \mu_0, n)$ | the probability that a product with effectiveness $\mu_0$ is approved                                             |
| $u(\alpha, \mu_0, n)$           | utility for an agent with effective size $\mu_0$ and number of samples $n$                                        |
| $n_{\mu_0}(\alpha)$             | optimal number of samples given p-value threshold $\alpha$ and effectiveness $\mu_0$                              |
| $\mu_\tau(\alpha)$              | The participation threshold belief under a p-value threshold $\alpha$                                             |
| $\alpha^*$                      | The critical p-value threshold such that $\mu_\tau(\alpha^*) = \mu_b$                                             |

Table 3: Primary Notation

## B Omitted proofs in Section 3

### Proof of Theorem 3.1

*Proof.* We first define the following variables for brevity. Let  $\Delta_\mu = \mu_0 - \mu_b$  denote the effect size,  $\sigma_0 = \sqrt{\mu_0(1 - \mu_0)}$  denote the standard deviation of the true process and  $\sigma_b = \sqrt{\mu_b(1 - \mu_b)}$  the standard deviation of the baseline Bernoulli variable. We use  $\phi(z)$  to denote the standard normal, and  $\Phi(z)$  to denote its CDF. Lastly, let  $d_\alpha = \Phi^{-1}(1 - \alpha)$  denote the  $1 - \alpha$  percentile of the standard normal. Recall that we work under the normal approximation of the binomial distribution where the critical threshold is:

$$z'_{\alpha,n} = \left\{ k \in \mathbb{R} \left| \int_k^\infty \mathcal{N}(n\mu_b, n\mu_b(1 - \mu_b)) \right. \right\} = n\mu_b + \Phi^{-1}(1 - \alpha) \sqrt{n\mu_b(1 - \mu_b)} = \mu_b n + d_\alpha \sigma_b \sqrt{n} \quad (4)$$

Thus, we may write the pass probability as follows, from which the expected utility expression follows:

$$\begin{aligned} \text{Pass}(\cdot) &= 1 - \Phi \left( \frac{z'_{n,\alpha} - n\mu_0}{\sqrt{n\mu_0(1 - \mu_0)}} \right) = 1 - \Phi \left( \frac{n\mu_b + d_\alpha \sqrt{n\mu_b(1 - \mu_b)} - n\mu_0}{\sqrt{n\mu_0(1 - \mu_0)}} \right) \\ &= 1 - \Phi \left( \frac{d_\alpha \sigma_b}{\sigma_0} - \frac{\Delta_\mu \sqrt{n}}{\sigma_0} \right) \\ \implies u(n; \alpha, \mu_0, \mu_b) &= R - R\Phi \left( \frac{d_\alpha \sigma_b}{\sigma_0} - \frac{\Delta_\mu \sqrt{n}}{\sigma_0} \right) - cn - c_0 \end{aligned}$$

Observe that when the drug is not effective, i.e.  $\mu_0 < \mu_b$ , then the argument to  $\Phi(\cdot)$  increases in  $n$ . Hence, the passing probability, and thus the expected revenue, decreases with increasing  $n$ . It is evident that the cost also increases in  $n$ . Thus, when the underlying drug is not effective, it is optimal for the agent to choose the smallest value  $n_{\min}$  possible. Computing the pass probability oracle with  $n_{\min}$ , they can determine their maximum expected utility and choose to participate if this is positive. In other words, when  $\mu_0 < \mu_b$ , a constant amount of computation suffices to determine the optimal participation decision.

We next turn to the more interesting case where  $\mu_0 \geq \mu_b$ . Our goal is to efficiently search the sample space by leveraging structural properties of the utility function. Letting  $v = \frac{d_\alpha \sigma_b}{\sigma_0} - \frac{\Delta_\mu \sqrt{n}}{\sigma_0}$ , the derivative of the utility function with respect to  $n$  is as follows:

$$\frac{\partial u}{\partial n} = -R \frac{\partial \Phi}{\partial v} \frac{\partial v}{\partial n} - c \quad (5)$$

$$= \phi(v) \frac{R\Delta_\mu}{2\sigma_0\sqrt{n}} - c = \frac{R\Delta_\mu}{2\sigma_0\sqrt{n}} \phi \left( \frac{d_\alpha \sigma_b}{\sigma_0} - \frac{\Delta_\mu \sqrt{n}}{\sigma_0} \right) - c \quad (6)$$

The first term is always positive, and since the image of  $\phi(\cdot)$  is always above 0. As  $n$  increases, this first term tends to 0, and the derivative is dominated by the second term and becomes negative. In other words, increasing  $n$  only increases utility to a point. To precisely understand this characteristic, consider the second derivative of the utility function:

$$\frac{\partial^2 u}{\partial n^2} = \frac{-R\Delta_\mu}{2\sigma_0 n^{3/2}} \phi(v) + \frac{R\Delta_\mu^2}{2\sigma_0^2 n} v \phi(v) = \frac{R\phi(v)\Delta_\mu}{2\sigma_0 n^{3/2}} \left[ \frac{\Delta_\mu v}{2\sigma_0} \sqrt{n} - 1 \right] \quad (7)$$

The sign of the second derivative, and thus the concavity/convexity properties of the utility function depend solely on  $\left[ \frac{\Delta_\mu v}{2\sigma_0} \sqrt{n} - 1 \right]$  since the term multiplying it is always positive. We now expand it by plugging in the definition of  $v$ :

$$\left[ \frac{\Delta_\mu v}{2\sigma_0} \sqrt{n} - 1 \right] = \frac{-\Delta_\mu}{2\sigma_0^2} n + \frac{d_\alpha \Delta_\mu \sigma_b}{2\sigma_0^2} \sqrt{n} - 1 = \frac{-\Delta_\mu}{2\sigma_0^2} t^2 + \frac{d_\alpha \Delta_\mu \sigma_b}{2\sigma_0^2} t - 1 \quad (8)$$

where we substitute in  $t = \sqrt{n}$ . Observe that this is a negative quadratic expression with only positive real root being meaningful (since  $\sqrt{n}$  cannot be negative). The roots  $n_1, n_2$  can easily be computed by applying the quadratic formula to the instance parameters. We categorize the outcome as follows:

- 849 1. No positive roots  $\implies$  the function is always *concave*
- 850 2. One positive root at  $n_1 \implies$  the function is *convex* over  $[0, n_1]$  and *concave* over  $[n_1, \infty)$ .
- 851 3. Two positive roots at  $n_1, n_2$  with  $n_2 > n_1 \implies$  that over  $[0, n_1]$  the function is *concave*, over
- 852  $[n_1, n_2]$  it is *convex* and over  $[n_2, \infty)$  it is *concave*.

853 We can consider the problem of optimizing  $n$  over each of these convex/concave regions defined by  
 854 the roots. Note that a convex function always attains its maximum on the boundary. Thus, for a the  
 855 convex interval, it suffices to just check the boundary points, of which there are only two. At the  
 856 optimal  $n$  for a concave interval, the first derivative is always 0, or it is a boundary point. Since the  
 857 latter case is similar to the first one, it suffices to find where the first derivative is 0, if it exists. Since  
 858 the first derivative is always increasing (monotonic) and we need to find the  $x$ -intercept, a binary  
 859 search suffices: starting in the middle of the interval, increase  $n$  if the first derivative is positive, and  
 860 decrease it if negative. This makes at most  $\log n_{max}$  calls. It is immediate that taking max over the  
 861 best  $n$  from each of the at most three yields the globally optimal  $n_{\mu_0}(\alpha)$ . The agent can compute the  
 862 corresponding passing probability and utility and decide to participate if this is positive.  $\square$

### 863 **Proof of Lemma 3.1**

864 *Proof.* We start with the first direction. If an agent with prior belief  $\mu_0$  participates with  $n$  samples,  
 865 then by individual rationality, they must have non-negative utility. That is,  $\Pr[p(n, \mu_0; \mu_b) \leq \alpha] \cdot R \geq$   
 866  $(c \cdot n + c_0)$ , where  $(c \cdot n + c_0)$  is the cost. Now consider an agent with a prior belief  $\mu_1 \geq \mu_0$  and  
 867 using the same number of samples- $n$ . Observe that if  $\Pr[p(n, \mu_1; \mu_b) \leq \alpha] \geq \Pr[p(n', \mu_0; \mu_b) \leq$   
 868  $\alpha]$ , then the agent will participate under belief  $\mu_1$ . To compute  $\Pr[p(n, \mu_1; \mu_b) \leq \alpha]$ , let  $n\hat{\mu} =$   
 869  $\sum_{i=1}^n X_i$  denote the observed outcomes of  $n$  samples drawn independently from the distribution with  
 870 effectiveness  $\mu_1$ . Observe that since the same number of samples are used here as when the belief  
 871 was  $\mu_0$ , the critical region  $z_{\alpha, n}$  does not change since it depends only on  $\alpha, n$  and  $\mu_b$ . The probability  
 872 that these samples, drawn with respect to belief  $\mu_1$ , will lie in this critical region:

$$\sum_{i \in z_{\alpha, n}} \binom{n}{i} \mu_1^i (1 - \mu_1)^{n-i} \geq \sum_{i \in z_{\alpha, n}} \binom{n}{i} \mu_0^i (1 - \mu_0)^{n-i}$$

873 where the inequality follows immediately since  $\mu_1 \geq \mu_0$ .

874 For the reverse, consider an agent with effectiveness  $\mu'_0$  not participating. This means that *for all*  
 875  $n$ , we have  $\Pr[p(n, \mu'_0; \mu_b) \leq \alpha] \cdot R_0 < (c \cdot n + c_0)$ . Then for an agent with belief  $\mu'_1 < \mu'_0$  the  
 876 following holds:

$$\forall n \sum_{i \in z_{\alpha, n}} \binom{n}{i} \mu_1^i (1 - \mu_1)^{n-i} < \sum_{i \in z_{\alpha, n}} \binom{n}{i} \mu_0^i (1 - \mu_0)^{n-i}$$

877 In other words, for each  $n$ , the passing probability under  $\mu'_1$  is worse than  $\mu'_0$ , and the agent was  
 878 already not participating under  $\mu'_0$  for any  $n$ .  $\square$

### 879 **Proof for Lemma 3.2**

880 *Proof.* We first consider solving for  $\mu_\tau(\alpha)$ , given an  $\alpha$ . To solve this upto some accuracy  $\varepsilon$ , we can  
 881 discretize the belief space into  $k = \frac{1}{\varepsilon}$  intervals of size  $\varepsilon$ , and use the mid-point of the interval as  
 882 its representative belief. The monotonicity of beliefs implies that we can run a binary search over  
 883 these intervals. Starting with the middle interval  $\frac{k}{2}$ , if the agent participates at its representative  
 884 belief, we need not search intervals larger than this. Similarly, if the agent does not participate, we  
 885 need not search all intervals smaller than this. Clearly, this terminates in  $\log(\frac{1}{\varepsilon})$  calls to the pass  
 886 probability oracle. To check participation, we need to compute the optimal  $n$  at every belief. Assume  
 887 the maximum number of sample is  $n_{max}$ , it will again take  $\log(n_{max})$  to search for the optimal  
 888 number of samples. So the total complexity should be  $\log(\frac{1}{\varepsilon}) * \log(n_{max})$ .

889 Next, we show that  $\mu_\tau(\alpha)$  is non-increasing as  $\alpha$  increases. For any  $\alpha$ , we know that at the  
 890 corresponding threshold belief  $\mu_\tau(\alpha)$  and its corresponding optimal sample size  $n_{\mu_\tau}(\alpha) \triangleq n_\tau(\alpha)$ ,  
 891 the utility is 0. In other words:  $R \cdot \text{Pass}(n_\tau(\alpha), \mu_\tau(\alpha), \mu_b, \alpha) = cn_\tau(\alpha) + c_0$ . It is known that for a

fixed effect size and number of samples, the passing probability of a hypothesis test increases in  $\alpha$ . In other words, for two p-values  $\alpha_1, \alpha_2$  where  $\alpha_1 \leq \alpha_2$ , the following holds:

$$\text{Pass}(\alpha_1, \mu_\tau(\alpha_1), n_\tau(\alpha_1)) \leq \text{Pass}(\alpha_2, \mu_\tau(\alpha_2), n_\tau(\alpha_2)) \quad \text{and} \quad u(n_\tau(\alpha_1), \mu_\tau(\alpha_1), \alpha_2) \geq 0$$

Since the agent with effectiveness  $\mu_\tau(\alpha_1)$  will have non-negative utility when using  $n_\tau(\alpha_1)$  samples when the p-value is  $\alpha_2$ , this agent will participate at this p-value (but not necessarily using  $n_\tau(\alpha_1)$  samples as that may not be optimal). The monotonicity of participation (Lemma 3.1) implies that under  $\alpha_2$ , agents with effectiveness greater than  $\mu_\tau(\alpha_1)$  will also participate. Thus, the participation threshold under  $\alpha_2$  by definition must be to the left of  $\mu_\tau(\alpha_1)$  - i.e.  $\mu_\tau(\alpha_2) \leq \mu_\tau(\alpha_1)$  as desired.  $\square$

### Proof for Lemma 3.3

*Proof.* We prove by contradiction. Assume that there exists an  $\alpha$  and  $\mu_1 \geq \mu_0$  such that  $u(\alpha, \mu_0, n_{\mu_0}(\alpha)) \geq u(\alpha, \mu_1, n_{\mu_1}(\alpha))$ . First note that if the agent is not participating in either, then the utility is always 0. If they participate in one and not the other, the monotonicity of participation (Lemma 3.1) means it must be under  $\mu_1$  (giving positive utility), with  $\mu_b$  being 0. Thus, the only situation where the initial claim could hold if the agent participates under both. We divide this into the following three cases:

- $\mu_0 \leq \mu_1 \leq \mu_b$ : since both  $\mu_0$  and  $\mu_1$  are less effective than the baseline drug, Theorem 3.1 implies that in both cases,  $n_{\min}$  samples are used, and in Lemma 3.1 we know that in such settings, for a fixed  $n$ , the pass probability increases in  $\mu$ . Thus the utility under  $\mu_1$  cannot be lower than  $\mu_0$ .
- $\mu_0 \leq \mu_b \leq \mu_1$  and  $\mu_b \leq \mu_0 \leq \mu_1$ : We know from Lemma 3.1 for every fixed  $n$ , the pass probability in this regime increases in  $\mu$ . Thus,  $\forall n, u(\alpha, \mu_0, n) \leq u(\alpha, \mu_1, n)$ . Since  $n_{\mu_1}(\alpha)$  is the optimal number of samples for  $\mu_1$ , we have

$$u(\alpha, \mu_0, n_{\mu_1}(\alpha)) \leq u(\alpha, \mu_1, n_{\mu_1}(\alpha)) \leq u(\alpha, \mu_0, n_{\mu_0}(\alpha))$$

The last step is according to the contradiction statement. However, this cannot be true since  $n_{\mu_1}(\alpha)$  could not be the optimal number of samples for  $\mu_1$  if it led to a lower utility than  $n_{\mu_0}(\alpha)$ .  $\square$

## C Omitted Proof for Section 4

For the ease of notation, let  $Q$  denote the CDF of the effectiveness distribution  $q$ . Further, let  $Q_{<\mu_b}$  and  $Q_{\geq\mu_b}$  denote the CDF of the belief distribution  $q$ , conditioned on  $\mu_0 < \mu_b$  and  $\mu_0 \geq \mu_b$ .

### Proof of Lemma 4.1

*Proof.* We are interested in the total derivative of the pass probability with respect to  $\alpha$  for any agent with effectiveness  $\mu_0 \geq \mu_b$ . Note that for this lemma, we consider the agent to always be participating. This total derivative can be expanded using the multi-variable chain rule as follows:

$$\frac{d}{d\alpha} \text{Pass}(\alpha, \mu_0, n_{\mu_0}(\alpha)) = \underbrace{\frac{\partial \text{Pass}}{\partial \alpha}}_{\text{Direct effect}} + \underbrace{\frac{\partial \text{Pass}}{\partial n} \cdot \frac{dn_{\mu_0}(\alpha)}{d\alpha}}_{\text{indirect effect}}. \quad (9)$$

To simplify notation, denote  $w_\alpha = \Phi^{-1}(1 - \alpha)$ , and let

$$\xi(n, \alpha) = \frac{\Phi^{-1}(1 - \alpha)\sigma_b - \sqrt{n}(\mu_0 - \mu_b)}{\sigma_0} = \frac{\sigma_b}{\sigma_0} w_\alpha - \frac{\sqrt{n}(\mu_0 - \mu_b)}{\sigma_0}$$

Then we have:  $\text{Pass}(\alpha, \mu_0, n_{\mu_0}(\alpha)) = 1 - \Phi(\xi(n_{\mu_0}(\alpha), \alpha))$ . We now separate the analysis based on the direct and indirect influence.

**Direct effect:** The partial derivative with respect to  $\alpha$  is:

$$\frac{\partial \text{Pass}}{\partial \alpha} = -\frac{d}{d\alpha} \Phi(\xi(n, \alpha)) = -\phi(\xi) \cdot \frac{\partial \xi}{\partial \alpha} = -\phi(\xi) \frac{\sigma_b}{\sigma_0} \frac{dw_\alpha}{d\alpha} = \frac{\sigma_b}{\sigma_0} \frac{\phi(\xi)}{\phi(z_\alpha)} \geq 0$$

927 since a higher  $\alpha$  lowers the critical threshold  $w_\alpha$  and makes the test easier to pass.

928 **Indirect effect:** The indirect effect depends on the optimal number of samples the agent uses for a  
 929 given  $\alpha$ . That is, while having more samples increases the chance of passing ( $\frac{\partial \text{Pass}}{\partial n} > 0$ ), the agent  
 930 might reduce this effort when  $\alpha$  increases (since the test becomes easier). The product of these two  
 931 terms is therefore unclear. Formally,

$$\frac{\partial \text{Pass}}{\partial n} = -\frac{d}{dn} \Phi(\xi(n, \alpha)) = -\phi(\xi) \frac{\partial \xi}{\partial n} = \phi(\xi) \cdot \frac{\mu_0 - \mu_b}{2\sigma_0 \sqrt{n}} > 0$$

932 To compute  $\frac{dn_{\mu_0}(\alpha)}{d\alpha}$ , let  $F(n, \alpha)$  be the first-order condition of the agent's utility function:  
 933  $u(\alpha, \mu_0, n) = R\text{Pass}(\alpha, \mu_0, n) - cn - c_0$ . Since we know  $n_{\mu_0}(\alpha)$  is the optimal number of samples,  
 934 we claim that:

$$F(\alpha, n_{\mu_0}(\alpha)) = R \cdot \frac{\partial \text{Pass}}{\partial n} \Big|_{n=n_{\mu_0}(\alpha)} - c = 0. \quad (10)$$

935 This holds because, as we show immediately below, the second derivative of the  $\text{Pass}(\cdot)$  function  
 936 is always strictly negative with respect to  $n$ , meaning the utility function is always strictly concave.  
 937 This is formalized below:

938 **Lemma C.1.** *The second derivative of Pass with respect to  $n$  is always negative  $-\frac{\partial^2 \text{Pass}}{\partial n^2} < 0$ .*

939 *Proof.* To see this,

$$\frac{\partial^2 \text{Pass}}{\partial n^2} = \frac{d}{dn} \left( \phi(\xi) \cdot \frac{(\mu_0 - \mu_b)}{2\sigma_0 \sqrt{n}} \right) = \phi(\xi) \cdot \left( -\frac{\xi(\mu_0 - \mu_b)^2}{4\sigma_0^2 n} - \frac{(\mu_0 - \mu_b)}{4\sigma_0 n^{3/2}} \right).$$

940 Since  $\phi(\xi) > 0$ ,  $\mu_0 - \mu_b > 0$ ,  $\sigma_0 > 0$ , and  $n > 0$ , and since  $\xi$  can be either sign, the two terms in  
 941 the parentheses are both negative (even if  $\xi < 0$ , the negative sign in front ensures negativity). Thus,  
 942 the entire expression is strictly negative:  $\frac{\partial^2 \text{Pass}}{\partial n^2} < 0$ . Intuitively this means that every new sample  
 943 increases the chance of passing, but each one helps less than the last.  $\square$

944 The result above also means that the first derivative of  $F(\alpha, n)$  is always non-zero at  $n_{\mu_0}(\alpha)$ . It is  
 945 also evident that  $F(\alpha, n)$  is continuously differentiable. Thus, we can apply the Implicit Function  
 946 Theorem. Differentiating both sides of  $F(\alpha, n_{\mu_0}(\alpha)) = 0$  with respect to  $\alpha$  yields:

$$\frac{\partial F}{\partial n}(\alpha, n_{\mu_0}(\alpha)) \cdot \frac{dn_{\mu_0}(\alpha)}{d\alpha} + \frac{\partial F}{\partial \alpha}(\alpha, n_{\mu_0}(\alpha)) = 0 \implies \frac{dn_{\mu_0}(\alpha)}{d\alpha} = -\frac{\frac{\partial F}{\partial \alpha}}{\frac{\partial F}{\partial n}} \quad (11)$$

947 Next we compute  $\frac{\partial F}{\partial \alpha}$  and  $\frac{\partial F}{\partial n}$  accordingly. Observe that:

$$\frac{\partial F}{\partial \alpha} = R_0 \cdot \frac{\partial^2 \text{Pass}}{\partial n \partial \alpha}, \quad \text{where} \quad \frac{\partial^2 \text{Pass}}{\partial n \partial \alpha} = \frac{\mu_0 - \mu_b}{2\sigma_0 \sqrt{n}} \cdot \frac{\partial \phi(\xi)}{\partial \alpha}.$$

948 Since:

$$\frac{\partial \phi(\xi)}{\partial \alpha} = \frac{d\phi(\xi)}{d\xi} \cdot \frac{\partial \xi}{\partial \alpha} = -\xi \phi(\xi) \cdot \frac{\partial \xi}{\partial \alpha} = \xi \phi(\xi) \cdot \frac{\sigma_b}{\sigma_0} \frac{1}{\phi(w_\alpha)},$$

949 we have

$$\frac{\partial F}{\partial \alpha} = R_0 \cdot \frac{\mu_0 - \mu_b}{2\sigma_0 \sqrt{n}} \cdot \xi \phi(\xi) \cdot \frac{1}{\phi(w_\alpha)} \frac{\sigma_b}{\sigma_0}.$$

950 We next turn to computing the derivative of  $F$  with respect to  $n$ . Observe the following (where we  
 951 plug in  $\frac{\partial^2 \text{Pass}}{\partial n^2}$  from above):

$$\frac{\partial F}{\partial n} = R_0 \cdot \frac{\partial^2 \text{Pass}}{\partial n^2} = R_0 \cdot \left( \frac{\xi \phi(\xi)(\mu_0 - \mu_b)^2}{4\sigma_0^2 n} - \frac{\phi(\xi)(\mu_0 - \mu_b)}{4\sigma_0 n^{3/2}} \right).$$

952 Now plugging them back into the expression computed by the Implicit function theorem, we have:

$$\frac{dn_{\mu_0}(\alpha)}{d\alpha} = -\frac{\frac{\partial F}{\partial \alpha}}{\frac{\partial F}{\partial n}} \Big|_{n=n_{\mu_0}(\alpha)} = -\frac{\frac{(\mu_0 - \mu_b) \xi \phi(\xi)}{2\sigma_0 \sqrt{n_{\mu_0}(\alpha)}} \frac{\sigma_b}{\phi(w_\alpha)} \frac{\sigma_0}{\sigma_0}}{\frac{\xi \phi(\xi)(\mu_0 - \mu_b)^2}{4\sigma_0^2 n_{\mu_0}(\alpha)} - \frac{\phi(\xi)(\mu_0 - \mu_b)}{4\sigma_0 n_{\mu_0}(\alpha)^{3/2}}} = -\frac{\frac{2\xi \sqrt{n_{\mu_0}(\alpha)} \sigma_b}{\phi(w_\alpha)}}{\xi(\mu_0 - \mu_b) - \frac{\sigma_0}{\sqrt{n_{\mu_0}(\alpha)}}}.$$

953 **Total derivative.** Having computed the direct and indirect effects, we can directly compute the  
 954 total derivative. We have:

$$\frac{d}{d\alpha} \text{Pass}(\alpha, \mu_0, n_{\mu_0}(\alpha)) = \underbrace{\frac{\partial \text{Pass}}{\partial \alpha}}_{\text{Direct effect}} + \underbrace{\frac{\partial \text{Pass}}{\partial n} \bigg|_{n=n_{\mu_0}(\alpha)}}_{\text{indirect effect}} \cdot \frac{dn_{\mu_0}(\alpha)}{d\alpha}. \quad (12)$$

$$= \frac{\sigma_b}{\sigma_0} \frac{\phi(\xi)}{\phi(z_\alpha)} + \phi(\xi) \cdot \frac{\mu_0 - \mu_b}{2\sigma_0 \sqrt{n_{\mu_0}(\alpha)}} \cdot \frac{dn_{\mu_0}(\alpha)}{d\alpha} \quad (13)$$

$$= \frac{\sigma_b}{\sigma_0} \frac{\phi(\xi)}{\phi(z_\alpha)} \left( 1 - \frac{(\mu_0 - \mu_b) \xi}{\left( \xi(\mu_0 - \mu_b) - \frac{\sigma_0}{\sqrt{n_{\mu_0}(\alpha)}} \right)} \right). \quad (14)$$

955 The sign of  $\left( 1 - \frac{(\mu_0 - \mu_b) \xi}{\left( \xi(\mu_0 - \mu_b) - \frac{\sigma_0}{\sqrt{n_{\mu_0}(\alpha)}} \right)} \right)$  decides the monotonicity of the passing probability. As we  
 956 show below, when agent chooses the optimal number of samples  $n = n_{\mu_0}(\alpha)$ , it will never be the case  
 957 that  $\xi(\mu_0 - \mu_b) - \frac{\sigma_0}{\sqrt{n(\alpha)}} > 0$  (Lemma C.2), which implies that  $\left( 1 - \frac{(\mu_0 - \mu_b) \xi}{\left( \xi(\mu_0 - \mu_b) - \frac{\sigma_0}{\sqrt{n_{\mu_0}(\alpha)}} \right)} \right) > 0$   
 958 always holds at the optimal  $n_{\mu_0}(\alpha)$ , thus the passing probability at the optimal number of samples  
 959  $n_{\mu_0}(\alpha)$  is always monotonically increasing. We finish the proof by proving Lemma C.2

960 **Lemma C.2.** When  $n_{\mu_0}(\alpha)$  is the optimal sample size chosen by the agent to maximize utility, then  
 961  $\xi(\mu_0 - \mu_b) - \frac{\sigma_0}{\sqrt{n(\alpha)}} > 0$  never holds.

962 *Proof.* Recall the second derivative of the utility w.r.t  $n$  is:

$$\begin{aligned} \frac{\partial^2 \text{Utility}(n, \mu_0; \mu_b, \alpha)}{\partial n^2} &= \frac{\partial^2 \text{Pass}}{\partial n^2} \\ &= \frac{\xi \phi(\xi) (\mu_0 - \mu_b)^2}{4\sigma_0^2 n} - \frac{\phi(\xi) (\mu_0 - \mu_b)}{4\sigma_0 n^{3/2}} \\ &= \frac{\phi(\xi) (\mu_0 - \mu_b)}{4\sigma_0^2 n} \left( \xi(\mu_0 - \mu_b) - \frac{\sigma_0}{\sqrt{n}} \right) \end{aligned}$$

963 At the optimal number of sample  $n = n_{\mu_0}(\alpha)$ , the second derivative of the utility must be negative,  
 964 otherwise it implies that increasing the number of samples will increase the utility, which leads  
 965 to a contradiction to the fact that  $n = n_{\mu_0}(\alpha)$  is an optimal number of samples, thus we have the  
 966 following always holds at  $n = n_{\mu_0}(\alpha)$ :  $\xi(\mu_0 - \mu_b) - \frac{\sigma_0}{\sqrt{n_{\mu_0}(\alpha)}} \leq 0$ .  $\square$

967  $\square$

## 968 **Proof of Theorem 4.2**

969 *Proof.* Recall that the false negative rate in our setting consists of two components, conditioned on  
 970 whether agents participate. Observing that when an agent does not participate – i.e.  $\mu_0 < \mu_\tau(\alpha)$  –  
 971 their probability of passing the statistical test is 0, we can simplify the overall FN rate as follows:

$$\begin{aligned} \text{FN}(\alpha, \mathcal{I}) &= \mathbb{E}_{\mu_0 \sim q} [\text{Fail}(\alpha, \mu_0, n_{\mu_0}(\alpha)) | \mu_0 \geq \mu_b] \\ &= \underbrace{\mathbb{E}_{\mu_0 \sim q} [\text{Fail}(\alpha, \mu_0, n_{\mu_0}(\alpha)) | \mu_0 \geq \mu_b, \mu_0 \geq \mu_\tau(\alpha)] P(\mu_0 \geq \mu_\tau(\alpha) | \mu_0 \geq \mu_b)}_{\text{FN}_{\text{particip}}} + \underbrace{P[\mu_0 \leq \mu_\tau(\alpha) | \mu_0 \geq \mu_b]}_{\text{FN}_{\text{abstain}}} \end{aligned}$$

972 Consider first any  $\alpha_1 \leq \hat{\alpha}$ . We can explicitly express each component of the false negative as follows,  
 973 since we are guaranteed that  $\mu_\tau(\alpha_1) \geq \mu_b$ :

$$\text{FN}_{\text{particip}}(\alpha_1, \mathcal{I}) = \frac{1 - Q(\mu_\tau(\alpha_1))}{1 - Q(\mu_b)} \int_{\mu_\tau(\alpha_1)}^1 \text{Fail}(\alpha_1, \mu_0, n_{\mu_0}(\alpha)) \frac{q(\mu_0)}{1 - Q(\mu_\tau(\alpha_1))} d\mu_0 \quad (15)$$

$$\text{FN}_{\text{abstain}}(\alpha_1, \mathcal{I}) = \frac{Q(\mu_\tau(\alpha_1)) - Q(\mu_b)}{1 - Q(\mu_b)} \quad (16)$$

974 Let us focus on  $\text{FN}_{\text{particip}}$ . To simplify this, the following result is helpful. For a positive function  
 975  $g(x)$  and a function  $f(x)$  with minimum and maximum values  $f_{\min}$  and  $f_{\max}$  over an interval  $[a, b]$ ,  
 976 the following holds:

$$f_{\min} \int_a^b g(x) \leq \int_a^b g(x)f(x)dx \leq f_{\max} \int_a^b g(x) \implies f_{\min} \leq \frac{\int_a^b g(x)f(x)dx}{\int_a^b g(x)} \leq f_{\max}$$

977 Since the expression in the middle is between  $f_{\min}$  and  $f_{\max}$ , by the intermediate value theorem,  
 978 there exists an  $c \in [a, b]$  such that:  $f(c) = \frac{\int_a^b g(x)f(x)dx}{\int_a^b g(x)}$  which means: there exists a  $c$  such that  
 979  $f(c) \int_a^b g(x) = \int_a^b f(x)g(x)$ . This can be interpreted as an integral mean value theorem. Using this,  
 980 there exists a value  $\mu_c^1 \in [\mu_\tau(\alpha_1), 1]$  such that the  $\text{FN}_{\text{particip}}(\alpha_1)$  can be expressed as follows:

$$\begin{aligned} \text{FN}_{\text{particip}}(\alpha_1, \mathcal{I}) &= \frac{1 - Q(\mu_\tau(\alpha_1))}{1 - Q(\mu_b)} \text{Fail}(\alpha_1, \mu_c^1, n_{\mu_c^1}(\alpha)) \int_{\mu_\tau(\alpha_1)}^1 \frac{q(\mu_0)}{1 - Q(\mu_\tau(\alpha_1))} d\mu_0 \\ &= \frac{1}{1 - Q(\mu_b)} \text{Fail}(\alpha_1, \mu_c^1, n_{\mu_c^1}(\alpha)) \int_{\mu_\tau(\alpha_1)}^1 \frac{q(\mu_0)}{1 - Q(\mu_\tau(\alpha_1))} d\mu_0 \\ &= \frac{1 - Q(\mu_\tau(\alpha_1))}{1 - Q(\mu_b)} \text{Fail}(\alpha_1, \mu_c^1, n_{\mu_c^1}(\alpha)) \end{aligned}$$

981 Therefore, we can write:

$$\text{for some } \mu_c^1 \in [\mu_\tau(\alpha_1), 1]: \text{FN}(\alpha_1, \mathcal{I}) = \frac{1 - Q(\mu_\tau(\alpha_1))}{1 - Q(\mu_b)} \text{Fail}(\alpha_1, \mu_c^1, n_{\mu_c^1}(\alpha)) + \frac{Q(\mu_\tau(\alpha_1)) - Q(\mu_b)}{1 - Q(\mu_b)}$$

982 Now consider an  $\alpha_2$  such that  $\alpha_1 < \alpha_2 \leq \alpha^*$ . Note that due to Appendix B,  $\mu_\tau(\alpha_2) \leq \mu_\tau(\alpha_1)$ . We  
 983 can thus write the  $\text{FN}_{\text{particip}}$  of this instance as follows:

$$\begin{aligned} \text{FN}_{\text{particip}}(\alpha_2, \mathcal{I}) &= \frac{1 - Q(\mu_\tau(\alpha_2))}{1 - Q(\mu_b)} \int_{\mu_\tau(\alpha_2)}^1 \text{Fail}(\alpha_2, \mu_0, n_{\mu_0}(\alpha)) \frac{q(\mu_0)}{1 - Q(\mu_\tau(\alpha_2))} d\mu_0 \\ &= \frac{1}{1 - Q(\mu_b)} \left[ \int_{\mu_\tau(\alpha_2)}^{\mu_\tau(\alpha_1)} \text{Fail}(\alpha_2, \mu_0, n_{\mu_0}(\alpha_2)) q(\mu_0) d\mu_0 + \int_{\mu_\tau(\alpha_1)}^1 \text{Fail}(\alpha_2, \mu_0, n_{\mu_0}(\alpha_2)) q(\mu_0) d\mu_0 \right] \\ &= \frac{1}{1 - Q(\mu_b)} \left[ \text{Fail}(\alpha_2, \mu_c^{2,1}, n_{\mu_c^{2,1}}(\alpha)) \int_{\mu_\tau(\alpha_2)}^{\mu_\tau(\alpha_1)} q(\mu_0) d\mu_0 + \text{Fail}(\alpha_2, \mu_c^{2,2}, n_{\mu_c^{2,2}}(\alpha)) \int_{\mu_\tau(\alpha_1)}^1 q(\mu_0) d\mu_0 \right] \\ &= \text{Fail}(\alpha_2, \mu_c^{2,1}, n_{\mu_c^{2,1}}(\alpha)) \frac{Q(\mu_\tau(\alpha_1)) - Q(\mu_\tau(\alpha_2))}{1 - Q(\mu_b)} + \text{Fail}(\alpha_2, \mu_c^{2,2}, n_{\mu_c^{2,2}}(\alpha)) \frac{1 - Q(\mu_\tau(\alpha_1))}{1 - Q(\mu_b)} \end{aligned}$$

984 where in the third transition, we use the integral mean value theorem as in the previous  $\alpha_1$  case. Note  
 985 that for the integral between  $[\mu_\tau(\alpha_1), 1]$  in the  $\alpha_2$  setting, we know that for every  $\mu_0 \in [\mu_\tau(\alpha_1), 1]$ ,  
 986  $\text{Fail}(\alpha_2, \mu) < \text{Fail}(\alpha_1, \mu)$  since from Lemma 4.1, we know that the pass probability increases as  
 987 alpha increases and this set of agents participated under both  $\alpha_1$  and  $\alpha_2$ . This immediately means that  
 988  $\text{Fail}(\alpha_2, \mu_c^{2,2}, n_{\mu_c^{2,2}}(\alpha)) \leq \text{Fail}(\alpha_2, \mu_c^1, n_{\mu_c^1}(\alpha))$ . In the  $[\mu_\tau(\alpha_2), \mu_\tau(\alpha_1)]$ , the failure probability is  
 989 at most 1. Hence,  $\text{Fail}(\alpha_2, \mu_c^{2,1}, n_{\mu_c^{2,1}}(\alpha)) \leq 1$ . Thus, we can upper bound the FN participation loss  
 990 at  $\alpha_2$  as follows:

$$\text{FN}_{\text{particip}}(\alpha_2) \leq \frac{Q(\mu_\tau(\alpha_1)) - Q(\mu_\tau(\alpha_2))}{1 - Q(\mu_b)} + \text{Fail}(\alpha_1, \mu_c^1, n_{\mu_c^1}(\alpha)) \frac{1 - Q(\mu_\tau(\alpha_1))}{1 - Q(\mu_b)} \quad (17)$$

991 We now express the abstain loss for  $\alpha_2$  as follows:

$$\text{FN}_{\text{abstain}}(\alpha_2) = \frac{Q(\mu_\tau(\alpha_2)) - Q(\mu_b)}{1 - Q(\mu_b)} = \frac{Q(\mu_\tau(\alpha_1)) - Q(\mu_b)}{1 - Q(\mu_b)} - \frac{Q(\mu_\tau(\alpha_1)) - Q(\mu_\tau(\alpha_2))}{1 - Q(\mu_b)}$$

992 Then we have that:

$$\text{FN}(\alpha_2, \mathcal{I}) = \text{FN}_{\text{particip}} + \text{FN}_{\text{abstain}} \quad (18)$$

$$\leq \text{Fail}(\alpha_1, \mu_c^1, n_{\mu_c^1}(\alpha)) \frac{1 - Q(\mu_\tau(\alpha_1))}{1 - Q(\mu_b)} + \frac{Q(\mu_\tau(\alpha_1)) - Q(\mu_b)}{1 - Q(\mu_b)} = \text{FN}(\alpha_1, \mathcal{I}) \quad (19)$$

993 Lastly, for any  $\alpha \geq \hat{\alpha}$ , we know from Proposition 4.2 that  $\text{FN}_{\text{particip}}(\alpha, \mathcal{I}) = 0$  and from Proposi-  
 994 tion 4.1 that  $\text{FN}_{\text{abstain}}(\alpha, \mathcal{I}) = 0$ .  $\square$

## 995 D Plot for Vaccine Drugs

Figure 4:  $\hat{\alpha}$  vs Revenue - Vaccines

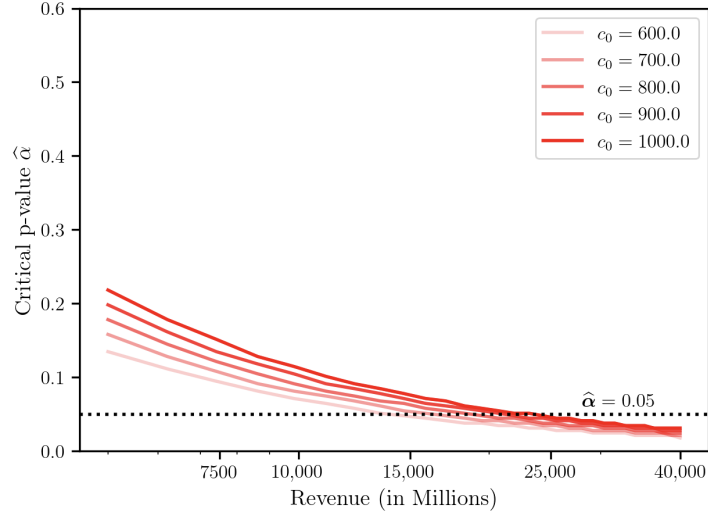

Supplement: supplementary_material [file Strategic_Hypothesis_Testing_supp.pdf › Strategic_Hypothesis_Testing_supp_Neurips2025/Strategic_Hypothesis_Testing_supp.pdf]
